# Supplementary material
Source: publisher figshare collection journal article supplement (https://acs.figshare.com/ndownloader/files/5637630)
Supplement: Supplementary file 1 [file 5637630]

**Supporting Information**

**Carbon Dioxide Absorption into Aqueous Potassium Salt Solutions of Arginine for Post-Combustion Capture**

**Shufeng Shen * , Ya-nan Yang**

*School of Chemical and Pharmaceutical Engineering, Hebei University of Science and Technology, Shijiazhuang 050018, P.R. China*

***Corresponding author’s e-mail: [sfshen@hebust.edu.cn](mailto:sfshen@hebust.edu.cn);

Tel.: +86 311 88632183. Fax: +86 311 88632183.

- **Estimation of physicochemical properties**

Density measurements were performed using a digital oscillating tube density meter (Anton Paar, DMA-4100M) having stated precision of ± 1.0 ×10-4 g cm-3. Viscosity measurements were done using a digital rolling ball microviscometer (Anton Paar, Lovis 2000M/ME) with the precision up to 0.5 %.

These property data were reported in our earlier work1 and empirical correlations were given as:

(S1)

(S2)

The physical solubility of N2O was determined experimentally in a thermostatted reactor. The experimental setup and procedure can be found in our previous work.2 Based on the Weissenberger and Schumpe model, the argininate ion-specific parameters (*h*Arg-) were obtained. The potassium ion and gas specific parameters were taken from literature.3 The physical solubility of CO2 in the aqueous ArgK solutions can be estimated since the solubility of CO2 in water is well correlated:1,4,5

(S3)

(S4)

(S5)

where *hi* is the ion-specific parameter; *hg* is the gas-specific parameter; *Ci* and *Cs* are the concentration of ion *i* and the AAS, respectively.

CO2 diffusion coefficient in aqueous ArgK solution can be estimated using a modified Stokes–Einstein relation:

(S6)

where DCO2*,*H2O and ηH2O are the diffusion coefficient and viscosity of CO2 in water, respectively, which can be taken from literature.4,6

(S7)

(S8)

The gas phase mass transfer coefficient and liquid film physical mass transfer coefficient can be calculated as:2

(S9)

(S10)

Brønsted relationships from the work of Versteeg et al. 7 and Penny and Ritter 8 were given as:

(S11)

(S12)

**Reference**

1. Bian,Y.; Shen, S.; Zhao, Y.; Yang, Y. Physicochemical properties of aqueous potassium salts of basic amino acids as absorbents for CO2 capture. **2016,** http://dx.doi.org/10.1021/acs.jced.6b00013
2. Shen, S.; Yang, Y.; Zhao, Y.; Bian, Y. Reaction kinetics of carbon dioxide absorption into aqueous potassium salt of histidine. *Chem. Eng. Sci*. **2016**, *146*, 76–87.
3. Weisenberger, S.; Schumpe, A. Estimation of gas solubilities in salt solutions at temperatures from 273 to 363 K. *AIChE J.* **1996**, *42*, 298–300.
4. Shen, S.; Feng, X.; Zhao, R.; Ghosh, U.K.; Chen, A. Kinetic study of carbon dioxide absorption with aqueous potassium carbonate promoted by arginine. *Chem. Eng. J.* **2013**,*222*, 478–487.
5. van Holst J.; Kersten S. R. A.; Hogendoorn J. A. Physiochemical properties of several aqueous potassium amino acid salts, *J. Chem. Eng. Data* **2008**, *531*, 286–1291.
6. Laliberté, M. Model for calculating the viscosity of aqueous solutions. *J. Chem. Eng. Data* **2007**, *52* (2), 321-335.
7. Versteeg, G. F., van Duck, L. A. J., Van Swaaij, W. P. M. On the kinetics between CO2 and alkanolamines both in aqueous and nonaqueous solutions. An overview. *Chem. Eng. Commun.* **1996**, *144*, 113–158.
8. Penny, D. E., Ritter, T. J. Kinetic study of the reaction between carbon dioxide and primary amines. *J. Chem. Soc. Faraday Trans. 1*. **1983**, *79*, 2103–2109.
9. Portugal, A. F.; Derks, P. W. J.; Versteeg, G. F.; Magalhães, F. D.; Mendes, A. Characterization of potassium glycinate for carbon dioxide absorption purposes. *Chem. Eng. Sci.* **2007**, *62*, 6534–6547.
10. Majchrowicz, M. E.; Kersten, S.; Brilman, W. Reactive absorption of carbon dioxide in L-prolinate salt solutions. *Ind. Eng. Chem. Res.* **2014**, *53*, 11460–11467.
11. Paul, S.; Thomsen, K. Kinetics of absorption of carbon dioxide into aqueous potassium salt of proline. *Int. J. Greenhouse Gas Control.* **2012**, *8*, 169–179.
12. Kumar, P. S.; Hogendoorn, J. A.; Versteeg, G. F. Kinetics of the reaction of CO2 with aqueous potassium salt of taurine and glycine. *AIChE J.***2003**, *49*, 203–213.
13. Simons, K.; Brilman, W.; Mengers, H.; Nijmeijer, K.; Wessling, M. Kinetics of CO2 absorption in aqueous sarcosine salt solutions: influence of concentration, temperature, and CO2 loading. *Ind. Eng. Chem. Res.* **2010**, *49*, 9693–9702.
14. Shen, S.; Yang, Y.; Bian, Y.; Zhao, Y. Kinetics of CO2 absorption into aqueous basic amino acid salt: potassium salt of lysine solution. *Environ. Sci. Technol*. **2016**, *50*, 2054 –2063.
15. Portugal, A. F.; Magalhães, F. D.; Mendes, A. Carbon dioxide absorption kinetics in potassium threonate. *Chem. Eng. Sci.* **2008**, *63*, 3493–3503.
16. Kim, M.; Song, H.; Lee, M.; Jo, H.; Park, J. Kinetics and steric hindrance effects of carbon dioxide absorption into aqueous potassium alaninate solutions. *Ind. Eng. Chem. Res.* **2012**, *51*, 2570–2577.
17. Luo X.; Hartono A.; Svendsen H. F. Comparative kinetics of carbon dioxide absorption in unloaded aqueous monoethanolamine solutions using wetted wall and string of discs columns. *Chem. Eng. Sci.* **2012**, *82*, 31–43.
18. Derks, P. W. J.; Kleingeld, T.; van Aken, C.; Hogendoorn, J. A.; Versteeg, G. F. Kinetics of absorption of carbon dioxide in aqueous piperazine solutions. *Chem. Eng. Sci*. **2006**, *61*, 6837 – 6854.
19. Lide, D. R. Eds. *CRC Handbook of Chemistry and Physics, 90th Edition* *(CD-ROM Version 2010)*, CRC Press: Taylor and Francis, Boca Raton, FL., 2010.

Table S1

Comparison of apparent second-order rate constants for amino acid salts and amines

| Absorbent | pKa a | *C*A, mol L-1 | *k2** b,m3 mol-1 s-1 | | Reference |
| --- | --- | --- | --- | --- | --- |
| 298K | 313K |
| ArgK | 9.00 | 1.05 | 19.50 | 31.2 | Present work |
| GlyK | 9.58 | 0.999 | 16.20 | 52.4 | 9 |
| ProK | 10.47 | 1.02 | 22.01 | 42.9 | 10,11 |
| TauK | 9.06 | 0.1- 4.0 | 3.74 | 8.0 | 12 |
| SarK | 9.97 | 1.0 | 21.6 | 40.6 | 13 |
| HisK | 9.09 | 1.04 | 6.49 | 10.6 | 2 |
| LysK | 10.67 c | 1.01 | 49.64 | 82.1 | 14 |
| ThrK | 8.96 | 1.0 | 6.16 | 11.4 | 15 |
| AlaK | 9.71 | 1.0 | 3.11 | 5.2 | 16 |
| MEA | 9.51 | 1.0 | 8.26 | 16.5 | 17 |
| PZ | 9.73 | 0.6-1.5 | 70 | 95.3 | 18 |

a The listed pKa 19 is for the α-amine groups in the amino acids and amines at 298 K.

b The values calculated from the equation:

c The listed pKa is for the side chain with amine group.
